# Supplementary material for: Sugarcane transgenics expressing MYB transcription factors show improved glucose release
Source: PubMed Central journal article supplement (PMC4946106; doi:10.1186/s13068-016-0559-1), 2016-07-15
Supplement: 13068_2016_559_MOESM2_ESM.pdf [file 13068_2016_559_MOESM2_ESM.pdf]

**Table S1 Normalised MYB genes  $\Delta$ Ct values.**

|           |    | <b>Young</b>       |           | <b>Maturing</b>    |           |
|-----------|----|--------------------|-----------|--------------------|-----------|
|           |    | <b>Mean</b>        | <b>SE</b> | <b>Mean</b>        | <b>SE</b> |
| Control   |    | 0                  | 0         | 0                  | 0         |
| MYB31 ORF | 13 | 1.34 <sup>a</sup>  | 0.14      | 2.19 <sup>c</sup>  | 0.04      |
|           | 11 | 1.10 <sup>ab</sup> | 0.21      | 1.49 <sup>c</sup>  | 0.02      |
|           | 2  | 0.65 <sup>c</sup>  | 0.02      | 0.30 <sup>d</sup>  | 0.01      |
|           | 7  | 0.50 <sup>c</sup>  | 0.01      | 2.55 <sup>bc</sup> | 0.24      |
|           | 1  | 0.06 <sup>d</sup>  | 0.00      | 0.29 <sup>d</sup>  | 0.01      |
|           | 8  | 0 <sup>d</sup>     | 0         | 4.87 <sup>ab</sup> | 1.51      |
|           | 9  | 0.78 <sup>bc</sup> | 0.10      | 5.42 <sup>a</sup>  | 1.12      |
| MYB31 UTR | 27 | 1.56 <sup>b</sup>  | 0.04      | 1.53 <sup>d</sup>  | 0.09      |
|           | 2  | 1.25 <sup>b</sup>  | 0.03      | 3.73 <sup>b</sup>  | 0.05      |
|           | 18 | 1.58 <sup>b</sup>  | 0.18      | 2.83 <sup>c</sup>  | 0.07      |
|           | 11 | 0.02 <sup>d</sup>  | 0.00      | 0.16 <sup>f</sup>  | 0.00      |
|           | 12 | 11.00 <sup>a</sup> | 1.16      | 5.53 <sup>a</sup>  | 0.70      |
|           | 7  | 0.10 <sup>c</sup>  | 0.01      | 0.45 <sup>e</sup>  | 0.03      |
|           | 20 | 0.09 <sup>c</sup>  | 0.00      | 0.32 <sup>e</sup>  | 0.00      |
| MYB42 ORF | 14 | 0.81 <sup>a</sup>  | 0.03      | 4.85 <sup>a</sup>  | 0.12      |
|           | 16 | 0.56 <sup>c</sup>  | 0.02      | 1.60 <sup>b</sup>  | 0.09      |
|           | 23 | 0.67 <sup>b</sup>  | 0.02      | 1.23 <sup>c</sup>  | 0.11      |
|           | 11 | 0.06 <sup>f</sup>  | 0.00      | 0.34 <sup>d</sup>  | 0.00      |
|           | 18 | 0.29 <sup>d</sup>  | 0.03      | 1.12 <sup>c</sup>  | 0.02      |
|           | 21 | 0.12 <sup>e</sup>  | 0.01      | 0.28 <sup>e</sup>  | 0.00      |
|           | 26 | 0.03 <sup>f</sup>  | 0.00      | 0.17 <sup>f</sup>  | 0.01      |
| MYB42 UTR | 28 | 0.26 <sup>bc</sup> | 0.03      | 0.36 <sup>c</sup>  | 0.00      |
|           | 6  | 0.45 <sup>a</sup>  | 0.04      | 1.29 <sup>a</sup>  | 0.04      |
|           | 32 | 0.32 <sup>b</sup>  | 0.01      | 0.23 <sup>d</sup>  | 0.01      |
|           | 30 | 0.24 <sup>c</sup>  | 0.00      | 1.10 <sup>b</sup>  | 0.06      |
|           | 15 | 0.12 <sup>d</sup>  | 0.01      | 0.20 <sup>e</sup>  | 0.01      |
|           | 26 | 0.05 <sup>de</sup> | 0.00      | 0.15 <sup>f</sup>  | 0.00      |
|           | 16 | 0 <sup>e</sup>     | 0         | 0.05 <sup>g</sup>  | 0.00      |
