# Supplementary material for: Sugarcane transgenics expressing MYB transcription factors show improved glucose release
Source: PubMed Central journal article supplement (PMC4946106; doi:10.1186/s13068-016-0559-1), 2016-07-15
Supplement: 13068_2016_559_MOESM4_ESM.pdf [file 13068_2016_559_MOESM4_ESM.pdf]

**Table S3 MYB-expressing sugarcane cell wall composition.**

|           |           | Total lignin |              | Acid-insoluble lignin |              | Acid-soluble lignin |             | Ash Content |             | Glucose      |              | Xylose       |              | Galactose   |             | Arabinose   |             |             |
|-----------|-----------|--------------|--------------|-----------------------|--------------|---------------------|-------------|-------------|-------------|--------------|--------------|--------------|--------------|-------------|-------------|-------------|-------------|-------------|
|           |           | %            | +/-          | %                     | +/-          | %                   | +/-         | %           | +/-         | %            | +/-          | %            | +/-          | %           | +/-         | %           | +/-         |             |
| Control   |           | 23.37        | 0.39         | 17.92                 | 0.38         | 5.45                | 0.10        | 0.13        | 0.07        | 47.17        | 0.45         | 20.23        | 0.28         | 0.10        | 0.08        | 1.69        | 0.22        |             |
| MYB31 ORF | 13        | 21.74        | 0.15         | 16.49                 | 0.09         | 5.25                | <b>0.18</b> | 0.10        | 0.05        | 48.77        | 0.33         | 20.27        | 0.17         | 0.00        | 0.00        | 1.49        | 0.06        |             |
|           | 11        | 22.23        | 0.15         | 16.60                 | 0.17         | 5.64                | 0.11        | 0.19        | 0.02        | 45.45        | 0.41         | 22.05        | 0.15         | 1.24        | 0.02        | 2.95        | 0.03        |             |
|           | 2         | 22.50        | 0.04         | 17.61                 | 0.09         | <b>4.89</b>         | <b>0.07</b> | 0.11        | 0.01        | 47.79        | 0.30         | 20.83        | 0.13         | <b>1.05</b> | <b>0.02</b> | 2.21        | 0.04        |             |
|           | 7         | 23.07        | 0.30         | 17.61                 | 0.22         | 5.45                | 0.12        | 0.18        | 0.02        | 46.74        | 0.61         | <b>22.11</b> | <b>0.17</b>  | 0.00        | 0.00        | 2.24        | 0.06        |             |
|           | 1         | 23.08        | 0.29         | 17.86                 | 0.24         | 5.22                | 0.14        | 0.11        | 0.03        | 45.08        | 0.18         | <b>23.14</b> | <b>0.18</b>  | <b>0.98</b> | <b>0.01</b> | 2.24        | 0.03        |             |
|           | 8         | 23.88        | 0.40         | 18.47                 | 0.40         | 5.41                | 0.04        | 0.04        | 0.08        | 46.01        | 0.82         | 21.34        | 0.37         | <b>1.24</b> | <b>0.05</b> | 2.71        | 0.07        |             |
|           | 9         | 24.97        | 0.47         | 19.72                 | 0.40         | 5.25                | 0.11        | 0.12        | 0.09        | 46.88        | 0.56         | 20.88        | 0.39         | <b>1.07</b> | <b>0.05</b> | 2.28        | 0.03        |             |
|           | MYB31 UTR | 27           | <b>21.03</b> | <b>0.19</b>           | 16.29        | 0.14                | <b>4.74</b> | <b>0.05</b> | 0.27        | 0.05         | <b>51.76</b> | <b>0.51</b>  | <b>24.27</b> | <b>0.23</b> | 0.00        | 0.00        | 2.19        | 0.05        |
|           |           | 2            | 21.18        | 0.18                  | <b>15.63</b> | <b>0.12</b>         | 5.55        | 0.12        | 0.05        | 0.04         | 45.63        | 0.41         | <b>22.03</b> | <b>0.32</b> | <b>1.33</b> | <b>0.02</b> | <b>3.02</b> | <b>0.05</b> |
| 18        |           | 21.48        | 0.19         | <b>15.57</b>          | <b>0.18</b>  | 5.91                | 0.08        | 0.08        | 0.04        | 47.40        | 0.36         | <b>22.11</b> | <b>0.26</b>  | <b>1.28</b> | <b>0.00</b> | 2.71        | 0.06        |             |
| 11        |           | 22.25        | 0.07         | 17.10                 | 0.09         | 5.16                | 0.14        | 0.13        | 0.02        | 46.05        | 0.14         | <b>22.44</b> | <b>0.08</b>  | <b>1.06</b> | <b>0.05</b> | 2.58        | 0.03        |             |
| 12        |           | 22.40        | 0.16         | 17.01                 | 0.04         | 5.39                | 0.15        | 0.06        | 0.05        | 47.12        | 0.31         | 20.56        | 0.14         | 0.00        | 0.00        | 2.06        | 0.02        |             |
| 7         |           | 22.79        | 0.11         | 17.13                 | 0.06         | 5.66                | 0.15        | 0.13        | 0.04        | 45.38        | 0.17         | 20.15        | 0.15         | 0.32        | 0.26        | 1.92        | 0.05        |             |
| 20        |           | 22.86        | 0.07         | 17.47                 | 0.05         | 5.40                | 0.12        | 0.13        | 0.02        | 47.60        | 0.15         | 21.38        | 0.13         | 0.00        | 0.00        | 1.84        | 0.08        |             |
| MYB42 ORF |           | 14           | <b>18.51</b> | <b>0.13</b>           | <b>12.84</b> | <b>0.07</b>         | 5.67        | 0.20        | <b>0.36</b> | <b>0.03</b>  | 49.24        | 0.14         | 21.28        | 0.22        | <b>1.08</b> | <b>0.02</b> | 2.63        | 0.04        |
|           | 16        | <b>20.86</b> | <b>0.05</b>  | <b>15.25</b>          | <b>0.01</b>  | 5.61                | 0.04        | 0.16        | 0.06        | <b>49.62</b> | <b>0.38</b>  | 20.81        | 0.08         | 0.32        | 0.26        | 2.14        | 0.03        |             |
|           | 23        | <b>21.58</b> | <b>0.22</b>  | <b>15.85</b>          | <b>0.25</b>  | 5.73                | 0.06        | 0.03        | 0.05        | 47.86        | 0.18         | 19.60        | 0.34         | 0.30        | 0.24        | 2.17        | 0.05        |             |
|           | 11        | 22.05        | 0.09         | 16.94                 | 0.12         | 5.11                | 0.07        | 0.06        | 0.05        | 47.92        | 0.38         | <b>22.67</b> | <b>0.24</b>  | <b>0.98</b> | <b>0.02</b> | 2.08        | 0.02        |             |
|           | 18        | 22.38        | 0.10         | 16.76                 | 0.09         | 5.62                | 0.01        | 0.10        | 0.04        | 48.69        | 0.55         | 19.90        | 0.09         | 0.00        | 0.00        | 1.96        | 0.02        |             |
|           | 21        | 22.47        | 0.14         | 17.74                 | 0.07         | <b>4.73</b>         | <b>0.15</b> | 0.19        | 0.01        | 48.85        | 1.12         | 21.82        | 0.38         | 0.00        | 0.00        | 1.21        | 0.08        |             |
|           | 26        | 22.99        | 0.09         | 17.68                 | 0.01         | 5.30                | 0.10        | <b>0.29</b> | <b>0.06</b> | 46.61        | 0.33         | 21.61        | 0.22         | <b>1.10</b> | <b>0.06</b> | 2.50        | 0.06        |             |
| MYB42 UTR | 28        | <b>19.42</b> | <b>0.29</b>  | <b>13.78</b>          | <b>0.34</b>  | 5.64                | 0.05        | 0.05        | 0.06        | <b>50.55</b> | <b>0.13</b>  | 21.78        | 0.48         | 0.63        | 0.26        | 2.60        | 0.04        |             |
|           | 6         | <b>20.21</b> | <b>0.03</b>  | <b>14.40</b>          | <b>0.06</b>  | 5.81                | 0.08        | 0.07        | 0.02        | 46.41        | 0.16         | <b>23.28</b> | <b>0.14</b>  | <b>1.15</b> | <b>0.04</b> | <b>3.03</b> | <b>0.01</b> |             |
|           | 32        | <b>20.91</b> | <b>0.24</b>  | <b>15.46</b>          | <b>0.14</b>  | 5.45                | 0.14        | 0.23        | 0.06        | 47.83        | 0.29         | 21.53        | 0.11         | 0.28        | 0.23        | 1.96        | 0.05        |             |
|           | 30        | 21.51        | 0.30         | <b>15.29</b>          | <b>0.19</b>  | 6.21                | 0.20        | 0.14        | 0.06        | 49.12        | 0.28         | <b>23.94</b> | <b>0.23</b>  | <b>1.21</b> | <b>0.02</b> | 2.63        | 0.03        |             |
|           | 15        | 22.57        | 0.10         | 16.73                 | 0.08         | 5.84                | 0.06        | 0.07        | 0.01        | 47.10        | 0.31         | 21.59        | 0.22         | 0.00        | 0.00        | 1.72        | 0.07        |             |
|           | 26        | 23.48        | 0.11         | 18.36                 | 0.07         | 5.12                | 0.08        | 0.10        | 0.02        | 47.41        | 0.45         | <b>23.58</b> | <b>0.28</b>  | 0.00        | 0.00        | 1.67        | 0.03        |             |
|           | 16        | 24.15        | 0.21         | 18.98                 | 0.14         | 5.17                | 0.08        | 0.21        | 0.03        | 47.06        | 0.31         | 20.89        | 0.18         | 0.00        | 0.00        | 1.41        | 0.04        |             |
