# Supplementary material for: Sugarcane transgenics expressing MYB transcription factors show improved glucose release
Source: PubMed Central journal article supplement (PMC4946106; doi:10.1186/s13068-016-0559-1), 2016-07-15
Supplement: 13068_2016_559_MOESM5_ESM.pdf [file 13068_2016_559_MOESM5_ESM.pdf]

**Table S4 Glucose release by enzymatic hydrolysis.**

|           |    | <b>0 h</b>  |             | <b>6 h</b>   |             | <b>12 h</b>  |             | <b>24 h</b>  |             | <b>48 h</b>  |             | <b>72 h</b>  |             |
|-----------|----|-------------|-------------|--------------|-------------|--------------|-------------|--------------|-------------|--------------|-------------|--------------|-------------|
|           |    | mg/mL       | +/-         | mg/mL        | +/-         | mg/mL        | +/-         | mg/mL        | +/-         | mg/mL        | +/-         | mg/mL        | +/-         |
| Control   |    | 1.02        | 0.09        | 24.61        | 1.31        | 29.79        | 0.69        | 36.18        | 1.15        | 40.65        | 0.85        | 40.97        | 0.83        |
| MYB31 ORF | 13 | 1.07        | 0.07        | 25.72        | 0.20        | 31.38        | 0.12        | 34.94        | 0.65        | 38.06        | 0.72        | 38.47        | 0.93        |
|           | 11 | 1.09        | 0.00        | 26.39        | 0.22        | 31.51        | 0.21        | 37.63        | 1.04        | 36.99        | 0.31        | 39.76        | 0.29        |
|           | 2  | 0.97        | 0.07        | 23.85        | 0.43        | 27.83        | 0.95        | <b>30.80</b> | <b>0.70</b> | 37.91        | 1.77        | 37.56        | 0.45        |
| MYB31 UTR | 27 | 0.87        | 0.07        | 23.03        | 0.13        | 28.44        | 0.70        | 32.83        | 0.38        | <b>35.38</b> | <b>0.67</b> | 37.71        | 0.42        |
|           | 2  | 1.07        | 0.11        | 29.84        | 0.26        | <b>38.52</b> | <b>0.62</b> | <b>43.01</b> | <b>0.85</b> | <b>48.86</b> | <b>0.82</b> | <b>50.96</b> | <b>0.13</b> |
|           | 18 | 1.22        | 0.08        | 29.23        | 0.10        | <b>35.86</b> | <b>0.42</b> | <b>42.57</b> | <b>0.16</b> | <b>46.90</b> | <b>0.77</b> | <b>49.48</b> | <b>0.69</b> |
| MYB42 ORF | 14 | <b>1.57</b> | <b>0.06</b> | <b>34.29</b> | <b>0.15</b> | <b>41.06</b> | <b>0.41</b> | <b>47.41</b> | <b>0.35</b> | <b>53.89</b> | <b>1.49</b> | <b>58.43</b> | <b>1.71</b> |
|           | 16 | 1.38        | 0.02        | <b>34.80</b> | <b>0.10</b> | <b>43.31</b> | <b>0.36</b> | <b>47.79</b> | <b>0.22</b> | <b>51.92</b> | <b>0.89</b> | <b>53.58</b> | <b>0.46</b> |
|           | 23 | 1.42        | 0.02        | <b>33.18</b> | <b>0.69</b> | <b>43.03</b> | <b>1.23</b> | <b>44.61</b> | <b>0.59</b> | 52.14        | 3.23        | <b>51.76</b> | <b>0.70</b> |
| MYB42 UTR | 28 | 0.77        | 0.05        | 31.44        | 0.19        | <b>39.43</b> | <b>0.62</b> | <b>44.71</b> | <b>0.51</b> | <b>48.65</b> | <b>0.28</b> | <b>51.49</b> | <b>1.00</b> |
|           | 6  | 1.15        | 0.02        | <b>33.01</b> | <b>0.55</b> | <b>42.89</b> | <b>0.45</b> | <b>49.95</b> | <b>1.70</b> | <b>54.11</b> | <b>0.90</b> | <b>57.53</b> | <b>1.70</b> |
|           | 32 | 0.79        | 0.09        | 27.49        | 0.09        | <b>36.54</b> | <b>0.13</b> | 42.03        | 0.28        | <b>48.03</b> | <b>0.34</b> | <b>52.51</b> | <b>0.33</b> |
