# Supplementary material for: Sugarcane transgenics expressing MYB transcription factors show improved glucose release
Source: PubMed Central journal article supplement (PMC4946106; doi:10.1186/s13068-016-0559-1), 2016-07-15
Supplement: 13068_2016_559_MOESM6_ESM.pdf [file 13068_2016_559_MOESM6_ESM.pdf]

**Table S5 Cellulose crystallinity index of MYB bagasse.**

| <b>Plant</b> |    | <b>Crystallinity Index (%)</b> |
|--------------|----|--------------------------------|
| Control      | 8  | 49.03                          |
| Control      | 10 | 51.49                          |
| MYB31 ORF    | 27 | 45.56                          |
| MYB31 ORF    | 11 | 47.50                          |
| MYB31 UTR    | 18 | 45.60                          |
| MYB42 ORF    | 23 | 47.41                          |
| MYB42 UTR    | 32 | 45.97                          |
