# Supplementary material for: Sugarcane transgenics expressing MYB transcription factors show improved glucose release
Source: PubMed Central journal article supplement (PMC4946106; doi:10.1186/s13068-016-0559-1), 2016-07-15
Supplement: 13068_2016_559_MOESM7_ESM.pdf [file 13068_2016_559_MOESM7_ESM.pdf]

**Table S6 Primers for *ZmMYB* cloning, genomic PCR and qPCR**

|    | <b>Amplicon</b> | <b>Accession</b> | <b>Forward (5'-3')</b> | <b>Reverse (5'-3')</b> | <b>Size (bp)</b> |
|----|-----------------|------------------|------------------------|------------------------|------------------|
| 1  | MYB31ORF        | NM_001112479     | ATGGGGAGGTCGCCGTGCTG   | TCATTCATCTCGAGGCTTCT   | 819              |
| 2  | MYB31UTR        | NM_001112479     | ACAGCAGCAGCAACAACAAC   | TGGCGATGGTGATTACAGAG   | 1198             |
| 3  | MYB42ORF        | NM_001112539     | ATGGGGCGGTTCGCCGTGCTGC | TCACTTCATCTCCAGGCCTCT  | 780              |
| 4  | MYB42UTR        | NM_001112539     | ACTCGCTGCCTTCTCAAATC   | GGAGAAGAAAGGACGTGTGG   | 876              |
| 5  | MYB31ORF        |                  | GCGGTCGTTTCATTCGTTCTA  | GATCAGGGACCACTTGTTGC   | 699              |
| 6  | MYB31UTR        |                  | GCGGTCGTTTCATTCGTTCTA  | GATCAGGGACCACTTGTTGC   | 827              |
| 7  | MYB42ORF        |                  | GCGGTCGTTTCATTCGTTCTA  | GATGAGCGACCACTTGTTCC   | 699              |
| 8  | MYB42UTR        |                  | GCGGTCGTTTCATTCGTTCTA  | GATGAGCGACCACTTGTTCC   | 763              |
| 9  | MYB31           |                  | TCTTCCGGCTGGAGGACGAG   | GTGGCTGTGGCTCTGGCTCTG  | 80               |
| 10 | MYB42           |                  | ATCAAGGCCGAGGAGACGG    | AGAGGTCCAGGTTGAGGTCAG  | 64               |
